# Supplementary material for: Nuclearity versus oxidation state in the catalytic efficiency of MnII/IIIazo Schiff base complexes: computational study on supramolecular interactions and phenoxazinone synthase-like activity
Source: Royal Society of Chemistry journal article supplement (doi:10.1039/c7nj02280h), 2017-01-01
Supplement: c7nj02280h1.pdf [file c7nj02280h1.pdf]

## Electronic Supporting Information (ESI)

# Nuclearity versus oxidation state in catalytic efficiency of Mn<sup>II/III</sup> azo Schiff base complexes: Computational study on supramolecular interactions and phenoxazinone synthase like activity

Saikat Banerjee,<sup>a</sup> Paula Brandão,<sup>b</sup> Antonio Bauzá,<sup>c</sup> Antonio Frontera,<sup>\*c</sup> Miquel Barceló-Oliver<sup>c</sup>, Anangamohan Panja,<sup>d</sup> and Amrita Saha,<sup>\*a</sup>

<sup>a</sup>Department of Chemistry, Jadavpur University, Kolkata- 700032, India.

E-mail: amritasahachemju@gmail.com; asaha@chemistry.jdvu.ac.in; Tel. +91-33-2457294.

<sup>b</sup>Departamento de Química, CICECO, Universidade de Aveiro, 3810-193 Aveiro, Portugal.

<sup>c</sup>Departament de Química, Universitat de les Illes Balears, Crta. De Valldemossa km 7.5, 07122 Palma (Balears), Spain.

E-mail: toni.frontera@uib.es.

<sup>d</sup>Postgraduate Department of Chemistry, Panskura Banamali College, Panskura RS, WB 721152, India.

## CONTENTS:

|                                                                                                                                                                                              |    |
|----------------------------------------------------------------------------------------------------------------------------------------------------------------------------------------------|----|
| <b>Fig. S1:</b> <sup>1</sup> HNMR Spectrum of the ligand, H <sub>2</sub> L <sup>1</sup> .....                                                                                                | S2 |
| <b>Fig. S2:</b> <sup>1</sup> HNMR Spectrum of the ligand, H <sub>2</sub> L <sup>2</sup> .....                                                                                                | S3 |
| <b>Fig.S3:</b> FTIR spectrum of H <sub>2</sub> L <sup>1</sup> showing sharp peak at 1610 cm <sup>-1</sup> for C=N bond.....                                                                  | S4 |
| <b>Fig.S4:</b> FTIR spectrum of H <sub>2</sub> L <sup>2</sup> showing sharp peak at 1616 cm <sup>-1</sup> for C=N bond.....                                                                  | S5 |
| <b>Fig.S5:</b> FTIR spectrum of complex <b>1</b> showing sharp peak at 1625 cm <sup>-1</sup> for C=N bond.....                                                                               | S6 |
| <b>Fig. S6:</b> FTIR spectrum of complex <b>2</b> showing sharp peaks at 1622 cm <sup>-1</sup> and 2070 cm <sup>-1</sup> for C=N bond and μ <sub>1,1</sub> azido bridging, respectively..... | S7 |
| <b>Fig. S7:</b> View of the coordination environment of complex <b>2</b> .....                                                                                                               | S8 |
| <b>Fig. S8:</b> ESI mass spectrum of complex <b>1</b> .....                                                                                                                                  | S9 |

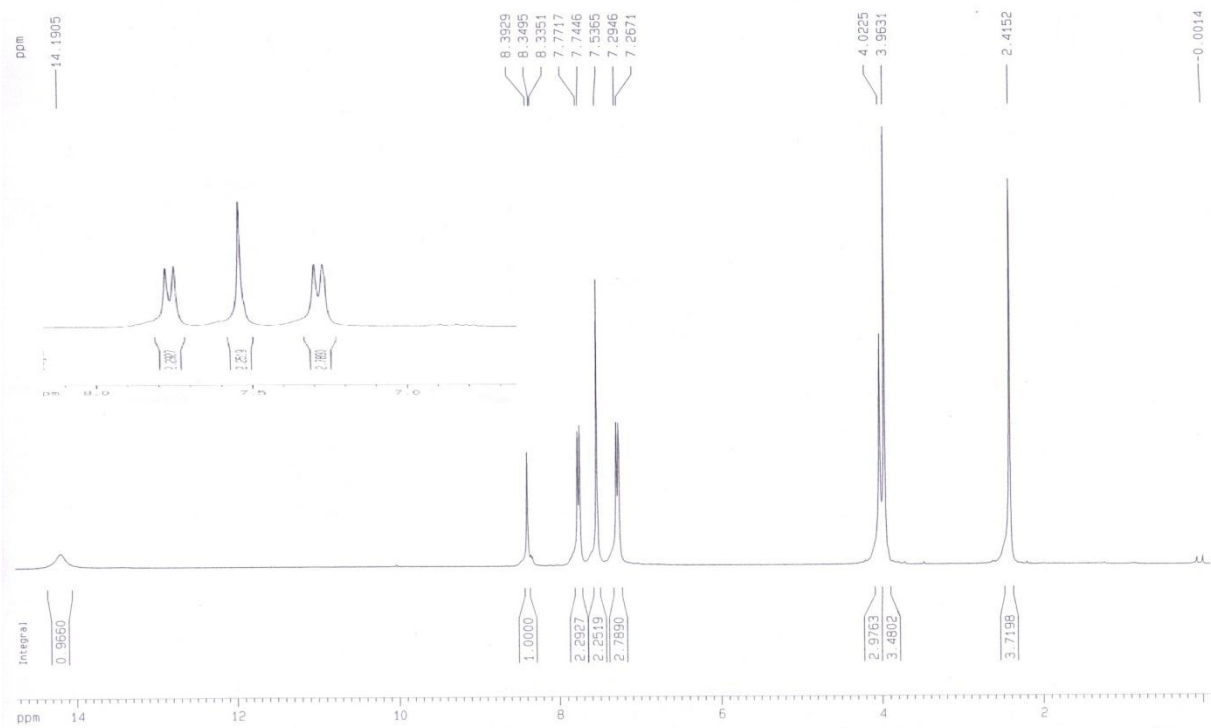

Fig. S1.  $^1\text{H}$  NMR( $\text{CDCl}_3$ , 300 MHz) spectrum of  $\text{H}_2\text{L}^1$ .

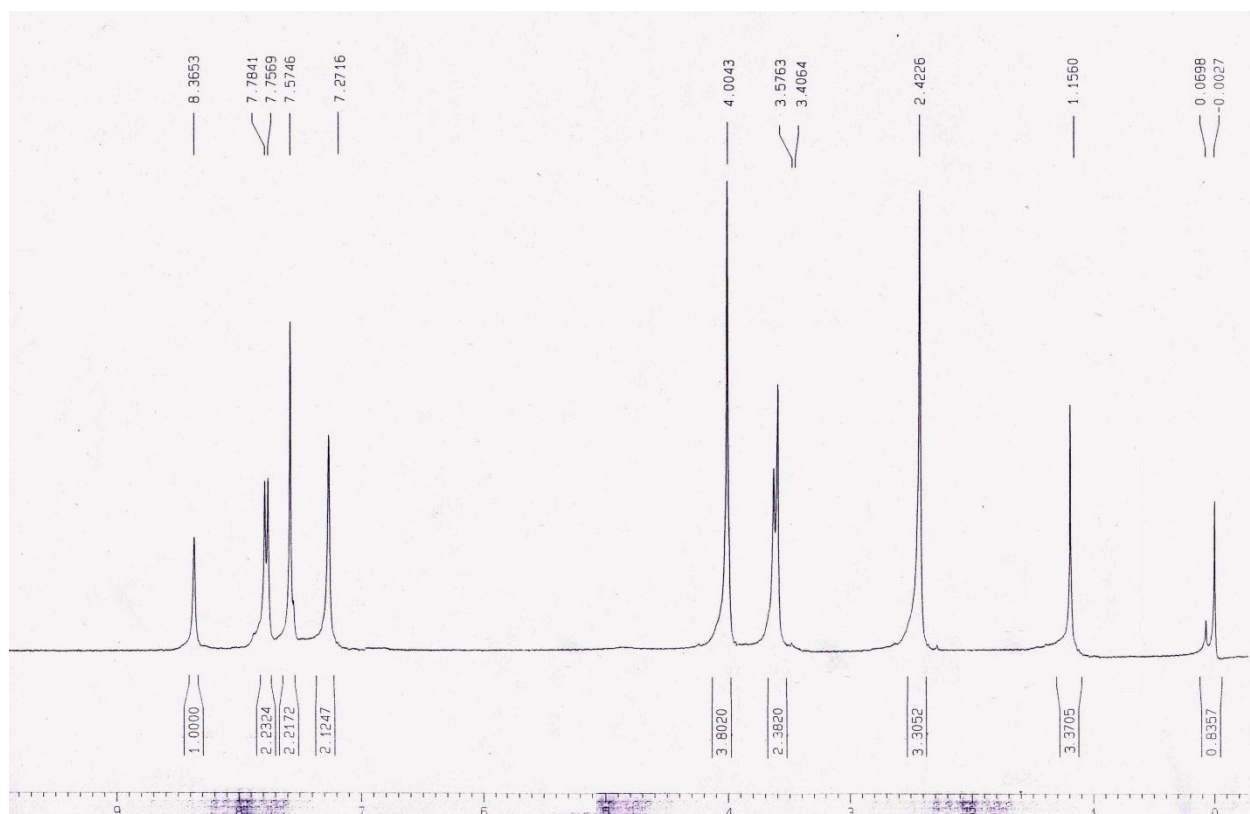

Fig. S2. <sup>1</sup>H NMR(CDCl<sub>3</sub>, 300 MHz) spectrum of **H<sub>2</sub>L<sup>2</sup>**.

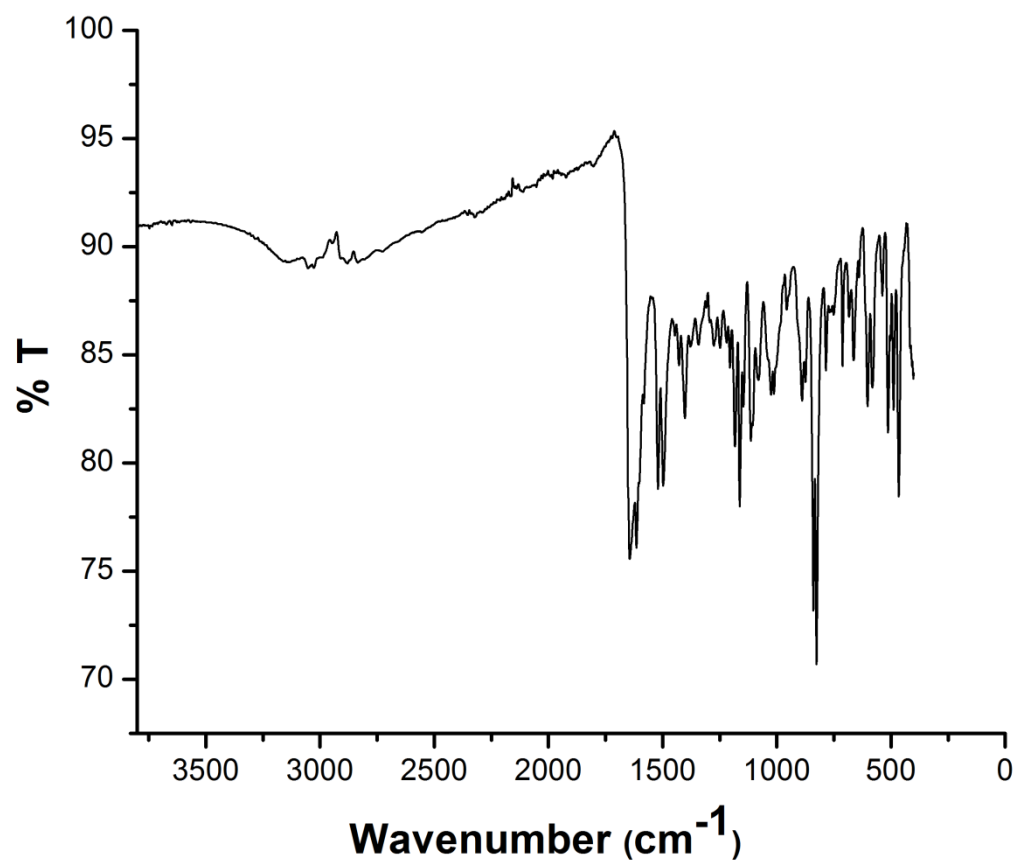

Fig. S3. FTIR spectrum of **H<sub>2</sub>L<sup>1</sup>**.

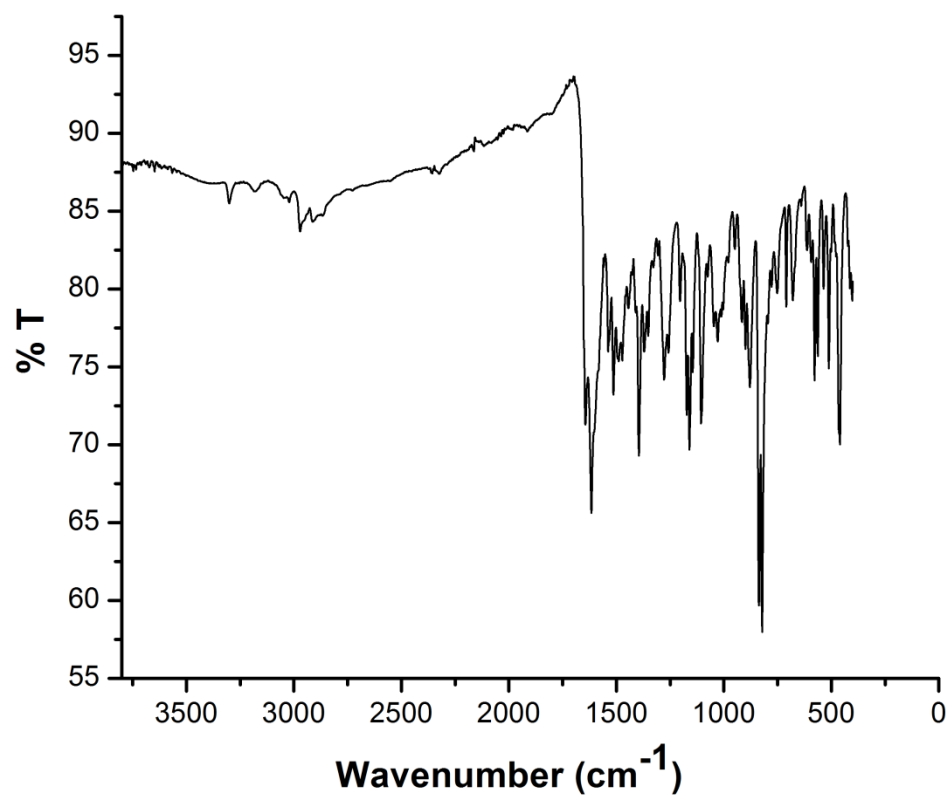

Fig. S4. FTIR spectrum of  $\text{H}_2\text{L}^2$ .

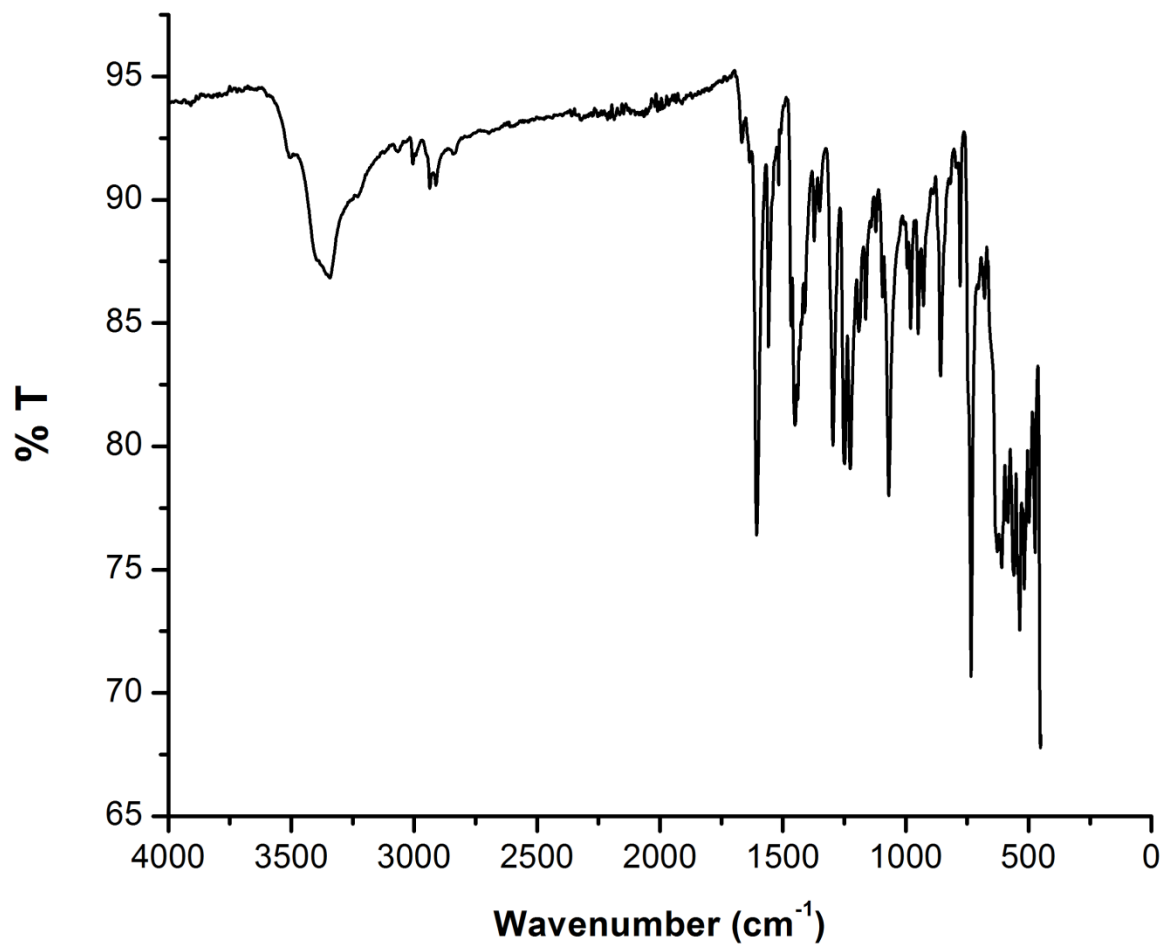

Fig. S5. FTIR spectrum of complex **1**.

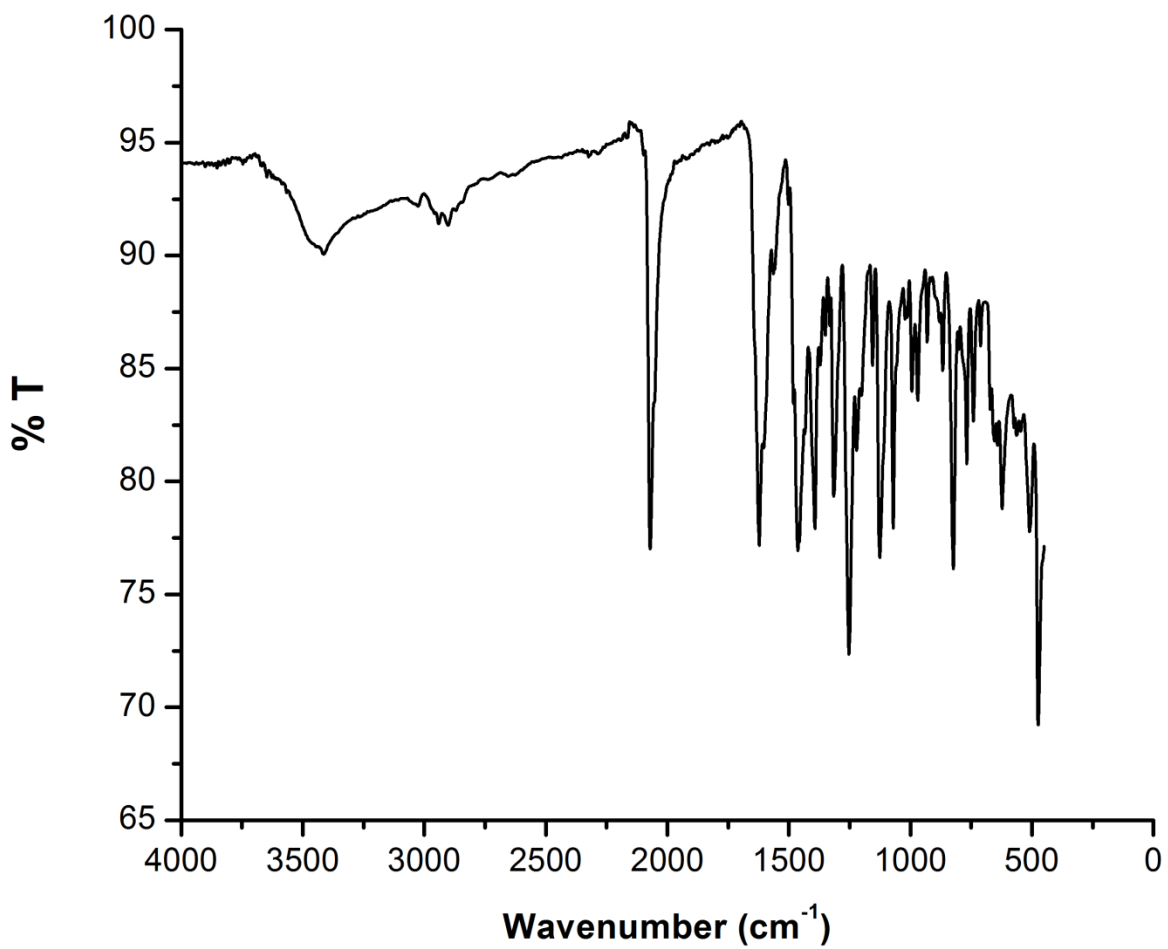

Fig. S6. FTIR spectrum of complex 2.

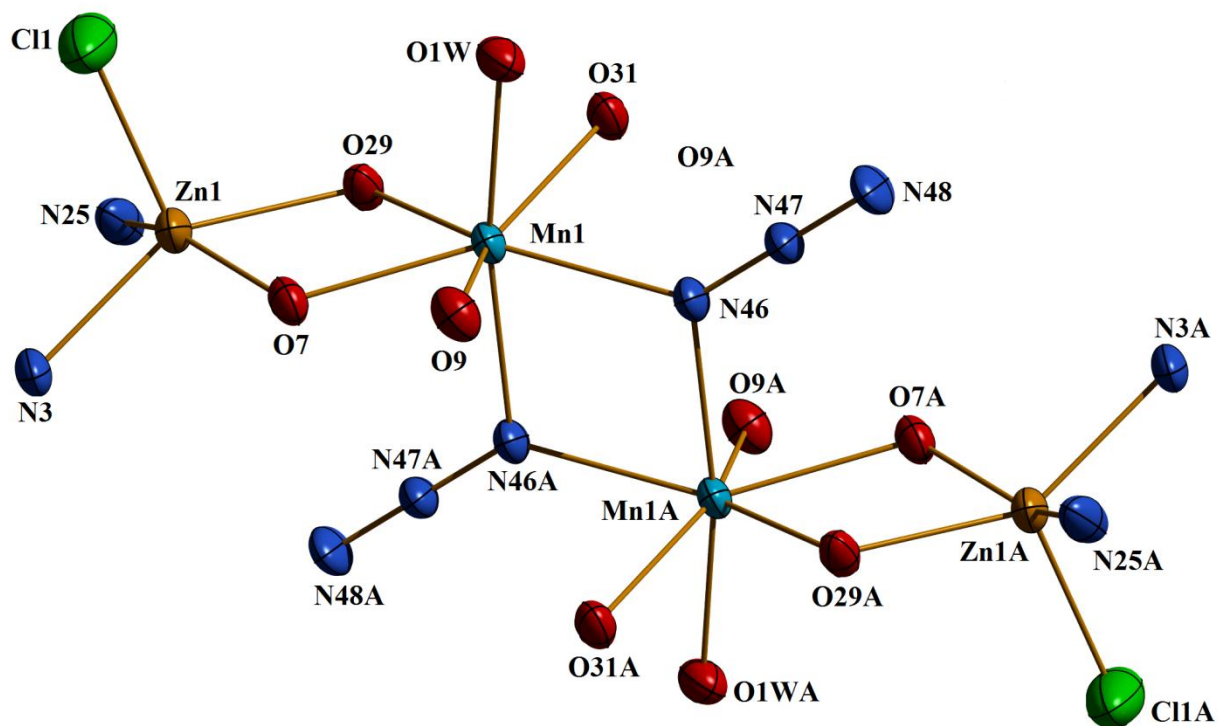

Fig. S7. View of the coordination environment of the Zn(II) and Mn(II) in complex 2.



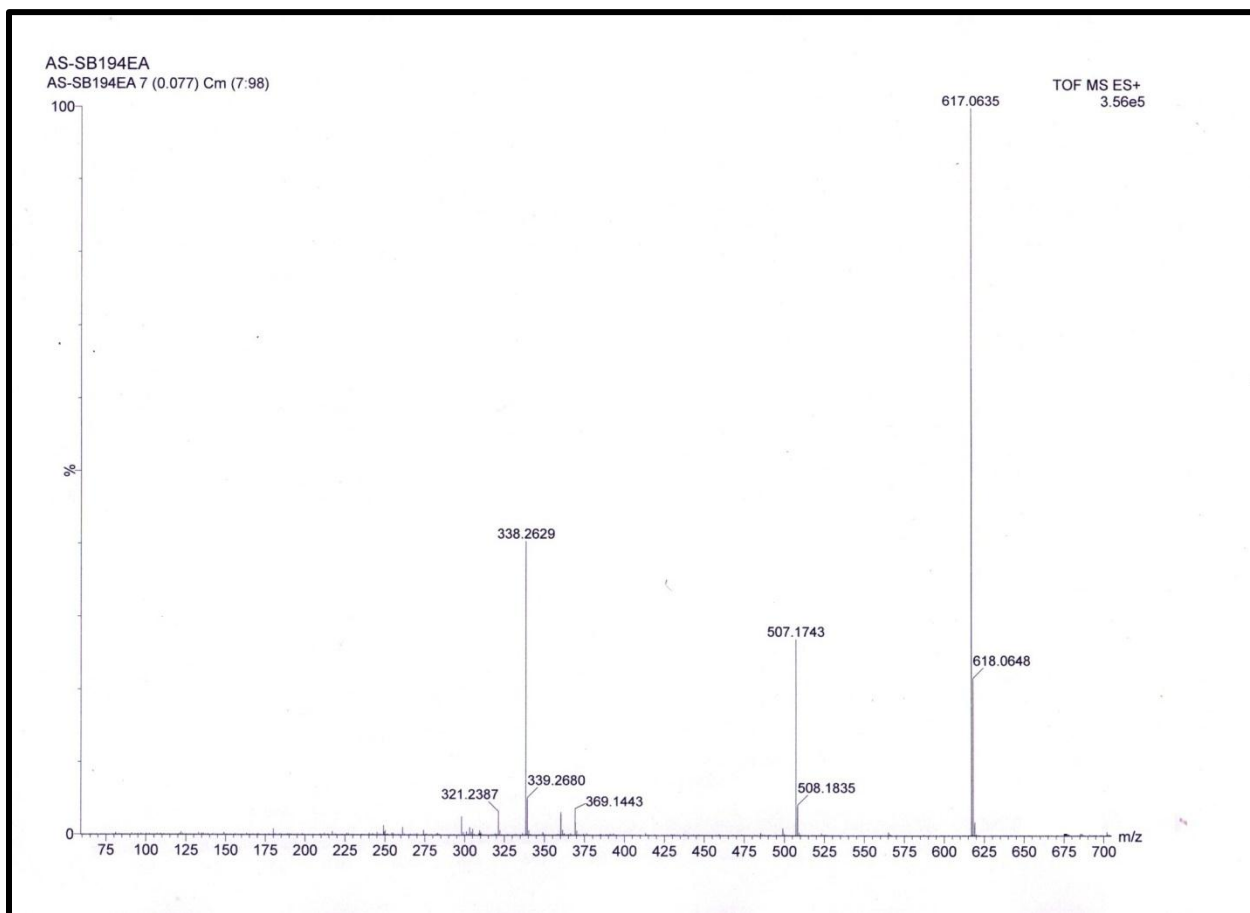

Fig.S8. ESI mass spectrum of complex 1.
